# Supplementary material for: Full-Length Genome Analyses of Two New Simian Immunodeficiency Virus (SIV) Strains from Mustached Monkeys (C. Cephus) in Gabon Illustrate a Complex Evolutionary History among the SIVmus/mon/gsn Lineage
Source: PubMed Central journal article supplement (PMC4113797; doi:10.3390/v6072880), 2014-07-22
Supplement: viruses-06-02880-s001.pdf [file viruses-06-02880-s001.pdf]

**Figure S3.** Secondary structure predictions of SIVmus-09Gab-OI81 and -11Gab-Pts02 TAR element. Secondary structure predictions showed that all arboreal *Cercopithecus* SIVs have a duplicated stem-loop structure consisting of a single nucleotide bulge (C or U), a 3-bp stem, and a 6-bp terminal loop with the sequence 5'-CUGGGA-3'. The predicted TAR secondary structures for SIVmus-09Gab-OI81 and 11Gab-Pts02 also exhibited duplicated TAR elements containing a 3-bp stem between the bulge and the terminal loop.

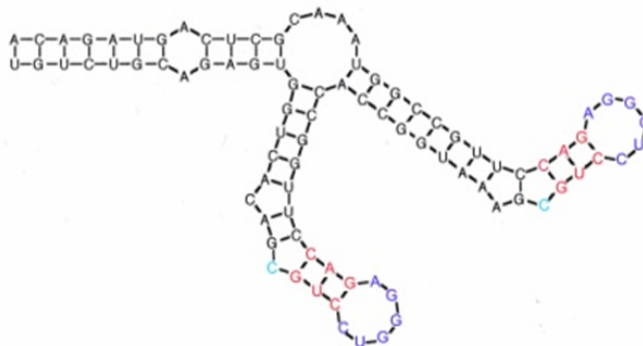

|              | Loop 1 |         |        | Loop 2 |         |        |
|--------------|--------|---------|--------|--------|---------|--------|
|              | Bulge  | bp stem | Loop   | Bulge  | bp stem | Loop   |
| SIVtal       | C      | 3       | CUGGGA | C      | 3       | CUGGGA |
| SIVdeb       | C      | 3       | CUGGGA | U      | 3       | CUGGGA |
| SIVgsn       | C      | 3       | CUGGGA | C      | 3       | CUGGGA |
| SIVsyk       | C      | 3       | CUGGGA | C      | 3       | CUGGGA |
| SIVmon       | C      | 3       | CUGGGA | C      | 3       | CUGGGA |
| SIVmus       | C      | 3       | CUGGGA | C      | 3       | CUGGGA |
| SIVmus-OI81  | C      | 3       | CUGGGA | C      | 3       | CUGGGA |
| SIVmus-Pts02 | C      | 3       | CUGGGA | C      | 3       | CUGGGA |

**Table S1.** Primers used to amplify full-length genomes of SIVmus-09Gab-OI81 and SIVmus-11Gab-Pts02.

| Samples                          | Primers <sup>a</sup>                                                                         | Size (kb) |
|----------------------------------|----------------------------------------------------------------------------------------------|-----------|
| <b><i>SIVmus-09Gab-OI81</i></b>  |                                                                                              |           |
| First round                      | * Polis4 (5'-CCAGCNCACAAAGGNATAGGAGG-3'); * PolOR (5'-ACBACYGCNCCTTCHCCTTTC-3')              |           |
| Second round                     | * Polis2 (5'TGGCARATRGAYTYACNCAYNTRGAA-3); * Uni2 (5'-CCCCTATTCCTCCCCTTCTTTTAAAA-3')         | 0.4       |
| First round                      | § OIPolF1 (5'-TAGCAAGTCAATGGCCAGTAAGTC -3'); * SIVenvR (5'-YTBYTGCTGCTGCAMTATCCC -3')        |           |
| Second round                     | * cpz6768 (5'-TTAAYTGTCATGGRGAATTYTTYTAYTG-3'); * SIVenvR                                    | 0.5       |
| First round                      | § OIPolF1 5'-TAGCAAGTCAATGGCCAGTAAGTC -3'); § OIEnvR3 (5'-GTCTATCTCCACCACTTTGTA-3')          |           |
| Second round                     | § OIPolF2 (5'-GCAAACAAGCAGCTAAAGACACA-3'); § OIEnvR2 (5'-GCTTTATTTGCAAGTCATCCA-3')           | 3.1       |
| First round                      | § OIEnvF1 (5'-TGGATGACTTGCAAATAAAGC-3'); * SIVnef-as (5'-CAGTCCHCCCTTTTCTTT-3')              |           |
| Second round                     | § OIEnvF2 (5'-TCTAAGTCAATATATCTCCACCA-3'); * SIVnef-as                                       | 1.4       |
| First round                      | § OINefF1 (5'-CTCCGCAGAACCCTATCCATC-3'); * SIVgagR (5'-GGNCCTCCCACTCCTTGGCADGC-3')           |           |
| Second round                     | § OINefF2 (5'-CGGAGGCAACGTCAAATCAG-3'); * SIVgagR                                            | 1.5       |
| First round                      | § OIGagF1 (5'-ACAGGGACCTAAGGAACCATT-3'); § OIPolR1 (5'-CTTGACTTTGAGGGTTGTATGGTA-3')          |           |
| Second round                     | § OIGagF2 (5'-CCTAAGGGCAGAACAGACA-3'); § OIPolR2 (5'-GCTGTGTTTCTCCCTGTTTCTCTA-3')            | 2.8       |
| <b><i>SIVmus-11Gab-Pts02</i></b> |                                                                                              |           |
| First round                      | & PolCMN F1 (5'-TCTYTATCCYTCCCTGTCTATCYCTCT-3'); & PolCMNR1 (5'-TCCCCYATTCCTCCCYTYTTTAA-3')  |           |
| Second round                     | & PolCMN F2 (5'-GACACMGGRGCNGAYGACACCAT-3'); & PolCMNR2 (5'-GCCTGTGCTACTGCTGTTTC-3')         | 2.4       |
| First round                      | & EnvCMNF1 (5'-TGTGTVAAYTGACHCCNATGTGTGT-3'); * SIVnef-as (5'-CAGTCCHCCCTTTTCTTT-3')         |           |
| Second round                     | & EnvCMNF2 (5'-CARATAGGAGCAGGMATGAC-3'); & EnvCMNR1 (5'-TTGGAGTTCTTGGAKCCCAT-3')             | 2.1       |
| First round                      | # Pts02-PolF1 (5'-TGGAATCAGGACAAAGCAACT-3'); # Pts02-EnvR1 (5'-CAAGCAAACCAATGTGTCTCTACT-3')  |           |
| Second round                     | # Pts02-PolF2 (5'-TACAATTAACAGAGGCAGCAGAAG-3'); # Pts02-EnvR2 (5'-GGCTTGTCACCTCATTGTTACT-3') | 4.1       |
| First round                      | # Pts02-EnvF1 (5'-GGAGCTACCAGACCTTGAGAA-3'); # Pts02-PolR1 (5'-CATCTCCTGGGTTATCTGCT-3')      |           |
| Second round                     | # Pts02-EnvF2 (5'-GACGAAGCTGGTGGCAACTCA-3'); # Pts02-Pol R2 (5'-CTGTTACCGGGAAATTTAGTGTGA-3') | 3.2       |

<sup>a</sup> Y = C ou T; W = A ou T; R = A ou G; H = A ou C ou T; B = C ou G ou T; M = A ou C; S = G ou C; K = G ou T; V = G ou A ou C; D = G ou A ou T; N = A ou G ou C ou T, I = inosine; \* SIV generic primers, § SIVmus-09Gab-OI81 specific primers; # SIVmus-11Gab-Pts02 specific primers; & SIVmus/mon/gsn/ lineage specific primers.
